# Supplementary material
Source: Springer Nature journal article supplement (https://www.springermedizin.de/resource/supplementary/12984_2010_245_MOESM5_ESM.pdf/9605608)

Hurst ss-exponent  $\alpha(Y)$  vs Entropy  $Y$

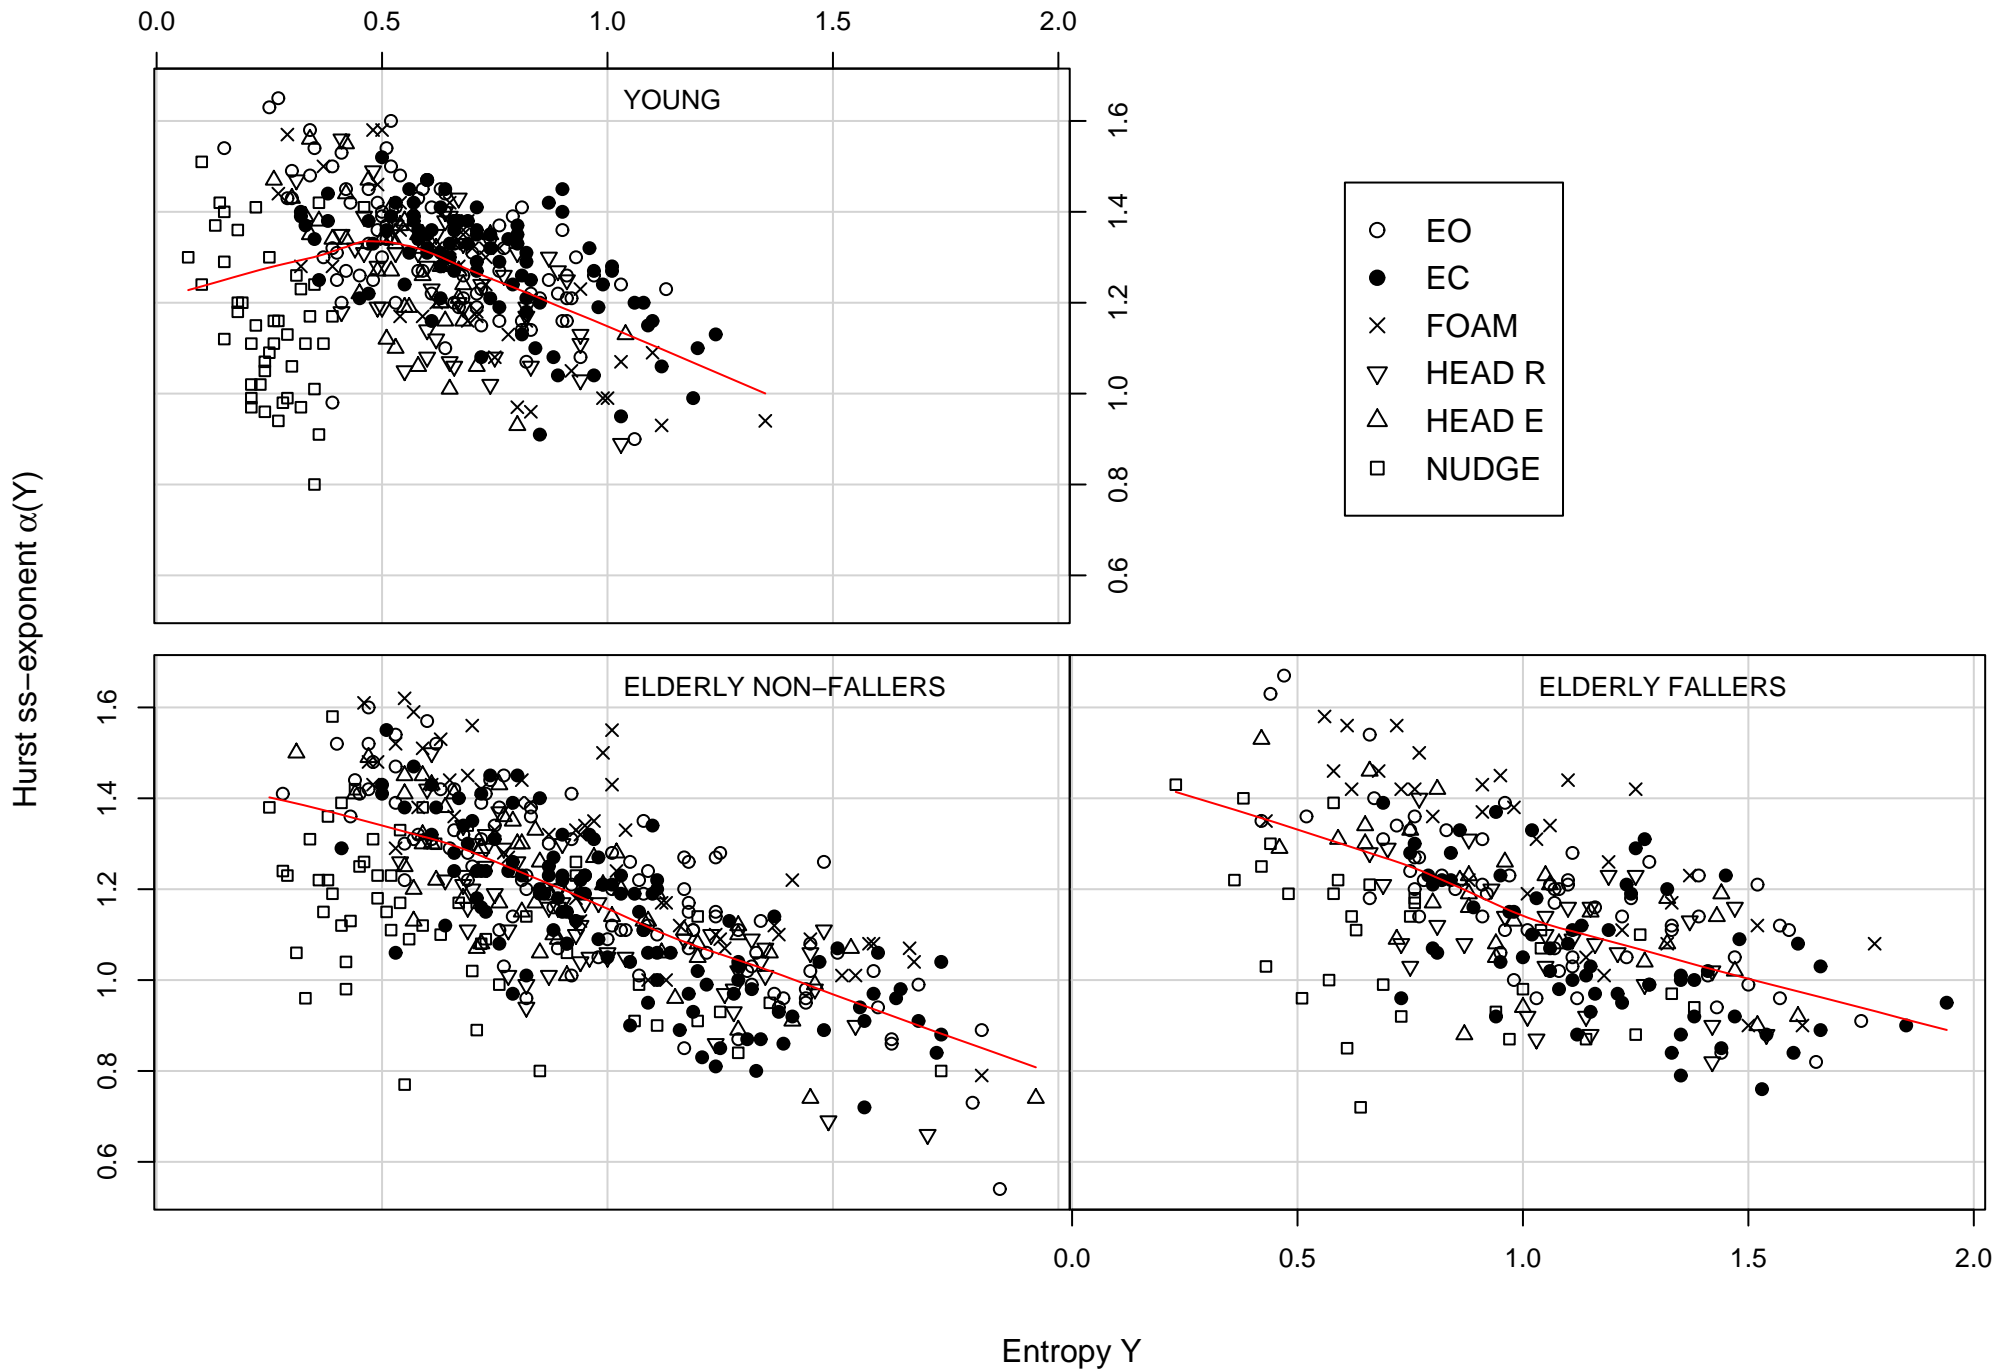

Supplement: MOESM5 [file 9605608]
